# Supplementary material
Source: PubMed Central journal article supplement (PMC4121815)
Supplement: 1404739111_pnas.201404739SI.pdf [file 1404739111_pnas.201404739SI.pdf]

# Supporting Information

Angers et al. 10.1073/pnas.1404739111

**Table S1. Residue 226 controls replication of sheep prions by deer and elk PrP**

| PrP expressed in Tg mice | Inoculum               |                       |                     |                     |                     |                      |
|--------------------------|------------------------|-----------------------|---------------------|---------------------|---------------------|----------------------|
|                          | SSBP/1                 | SSBP/1 in Tg(DeerPrP) | SSBP/1 in deer 6331 | SSBP/1 in deer 6339 | SSBP/1 in deer 6340 | SSBP/1 in Tg(ElkPrP) |
| Deer                     | 257 ± 13 (10/10)*      | 163 ± 1 (8/8)*        | 147 ± 3 (8/8)       | 164 ± 8 (10/10)     | 146 ± 2 (7/7)       | ND                   |
| Elk                      | 497 (0/6) <sup>†</sup> | 241 ± 8 (7/7)         | 203 ± 9 (9/9)       | 232 ± 12 (8/8)      | 191 ± 1 (4/4)       | ND                   |
| Deer-S96                 | 245 ± 15 (6/6)         | ND                    | ND                  | ND                  | ND                  | ND                   |
| Sheep                    | 132 ± 2 (8/8)          | 151 ± 3 (10/10)       | ND                  | ND                  | ND                  | 558 (1/7)            |

The numbers in parentheses refer to data reported in ref. 1. ND, not determined.

\*Previously reported (1).

<sup>†</sup>One mouse was found dead at 481 d.

1. Green KM, et al. (2008) The elk PRNP codon 132 polymorphism controls cervid and scrapie prion propagation. *J Gen Virol* 89(Pt 2):598–608.

**Table S2. Transgenic mouse modeling of the effects of deer PrP polymorphisms on prion susceptibility**

| PrP expressed in Tg mice | Inoculum  |                             |                |                        |               |                       |
|--------------------------|-----------|-----------------------------|----------------|------------------------|---------------|-----------------------|
|                          | None      | D10 (WT)                    | 135 (96G/S)    | 04–7951 (225F/S)       | D10 in TgF225 | SSBP/1 in Tg(DeerPrP) |
| DeerPrP                  | 606 (0/5) | 225 ± 1(8/8)                | 298 ± 36 (5/5) | 207 ± 4 (6/6)          | 267 ± 8 (5/5) | 163 ± 1 (8/8)         |
| PrPS96                   | 495 (0/6) | 517 ± 48 (3/5)*             | 530 (0/5)      |                        |               | 155 ± 3 (7/7)         |
| PrPH95                   | 345 (0/5) | 518 (0/6)                   | 509 (0/5)      |                        |               | 203 ± 9 (7/7)         |
| PrPF225                  | 600 (0/5) | 548 ± 36 (2/7) <sup>†</sup> |                | 503 (1/5) <sup>‡</sup> | >500 (0/5)    | 498 ± 11 (7/7)        |
| PrPORI <sup>§</sup>      | 541 (0/3) | 253 ± 16 (7/7)              |                |                        |               |                       |
|                          | 602 (0/2) |                             |                |                        |               |                       |

\*Two inoculated mice were found dead at 563 d without having manifested clinical signs.

<sup>†</sup>Three mice survived without a diagnosis of prion disease until 623–665 d after inoculation; two other mice died of intercurrent illnesses after 447 and 555 d.

<sup>‡</sup>One mouse was diagnosed 268 d after infection.

<sup>§</sup>Three uninoculated mice were humanely killed at 541 d without manifesting neurological deficits; two remaining mice survived to 602 d and were killed.

**Table S3. Susceptibility of Tg(DeerPrP) mice to CWD prions from wild-type and G/S96 deer**

| Tissues | Deer identities and genotypes |                |                |
|---------|-------------------------------|----------------|----------------|
|         | 139 (96G/G)                   | 142 (96G/G)    | 135 (96G/S)    |
| Obex    | 182 ± 8 (7/7)                 | 209 ± 15 (6/6) | 298 ± 36 (5/5) |
| RPLN    | 336 ± 11 (7/7)                | 321 ± 14 (7/7) | 344 ± 1 (8/8)  |
